# Supplementary material for: Detection of Low-Level Adulteration of Hungarian Honey Using near Infrared Spectroscopy
Source: MDPI journal article supplement (doi:10.3390/chemosensors11020089), 2023-01-24
Supplement: s1 [file s1]

Supplementary Table S1. Near infrared spectroscopy pretreatment combinations used for the spectral preprocessing

| Abbreviation             | Pretreatment (combination)                                                                                                                                                             |
|--------------------------|----------------------------------------------------------------------------------------------------------------------------------------------------------------------------------------|
| sgol@2-13-0              | Savitzky-Golay Smoothing 13 sample points, 2 <sup>nd</sup> polynomial no derivation                                                                                                    |
| sgol@2-17-0              | Savitzky-Golay Smoothing 17 sample points, 2 <sup>nd</sup> polynomial no derivation                                                                                                    |
| sgol@2-21-0              | Savitzky-Golay Smoothing 21 sample points, 2 <sup>nd</sup> polynomial no derivation                                                                                                    |
| SNV                      | Standard Normal Variate                                                                                                                                                                |
| MSC                      | Multiplicative scatter correction                                                                                                                                                      |
| detr                     | Detrending                                                                                                                                                                             |
| detr+MSC                 | Detrending + Multiplicative scatter correction                                                                                                                                         |
| detr+SNV                 | Detrending + Standard Normal Variate                                                                                                                                                   |
| sgol@2-13-0+SNV          | Savitzky-Golay Smoothing 13 sample points, 2 <sup>nd</sup> polynomial no derivation + Standard Normal Variate                                                                          |
| sgol@2-17-0+SNV          | Savitzky-Golay Smoothing 17 sample points, 2 <sup>nd</sup> polynomial no derivation + Standard Normal Variate                                                                          |
| sgol@2-21-0+SNV          | Savitzky-Golay Smoothing 21 sample points, 2 <sup>nd</sup> polynomial no derivation + Standard Normal Variate                                                                          |
| sgol@2-13-0 +MSC         | Savitzky-Golay Smoothing 13 sample points, 2 <sup>nd</sup> polynomial no derivation + Multiplicative scatter correction                                                                |
| sgol@2-17-0 +MSC         | Savitzky-Golay Smoothing 17 sample points, 2 <sup>nd</sup> polynomial no derivation + Multiplicative scatter correction                                                                |
| sgol@2-21-0 +MSC         | Savitzky-Golay Smoothing 21 sample points, 2 <sup>nd</sup> polynomial no derivation + Multiplicative scatter correction                                                                |
| sgol@2-13-0 +detr        | Savitzky-Golay Smoothing 13 sample points, 2 <sup>nd</sup> polynomial no derivation + Detrending                                                                                       |
| sgol@2-17-0 +detr        | Savitzky-Golay Smoothing 17 sample points, 2 <sup>nd</sup> polynomial no derivation + Detrending                                                                                       |
| sgol@2-21-0 +detr        | Savitzky-Golay Smoothing 21 sample points, 2 <sup>nd</sup> polynomial no derivation + Detrending                                                                                       |
| sgol@2-13-0 +detr +SNV   | Savitzky-Golay Smoothing 13 sample points, 2 <sup>nd</sup> polynomial no derivation + Detrending + Standard Normal Variate                                                             |
| sgol@2-17-0 +detr +SNV   | Savitzky-Golay Smoothing 17 sample points, 2 <sup>nd</sup> polynomial no derivation + Detrending + Standard Normal Variate                                                             |
| sgol@2-21-0 +detr +SNV   | Savitzky-Golay Smoothing 21 sample points, 2 <sup>nd</sup> polynomial no derivation + Detrending + Standard Normal Variate                                                             |
| sgol@2-13-0 +detr +MSC   | Savitzky-Golay Smoothing 13 sample points, 2 <sup>nd</sup> polynomial no derivation + Detrending + Multiplicative scatter correction                                                   |
| sgol@2-17-0 +detr +MSC   | Savitzky-Golay Smoothing 17 sample points, 2 <sup>nd</sup> polynomial no derivation + Detrending + Multiplicative scatter correction                                                   |
| sgol@2-21-0 +detr +MSC   | Savitzky-Golay Smoothing 21 sample points, 2 <sup>nd</sup> polynomial no derivation + Detrending + Multiplicative scatter correction                                                   |
| sgol@2-21-0 +sgol@2-21-1 | Savitzky-Golay Smoothing 21 sample points, 2 <sup>nd</sup> polynomial no derivation + Savitzky-Golay Smoothing 21 sample points, 2 <sup>nd</sup> polynomial 1 <sup>st</sup> derivative |
| sgol@2-21-0 +sgol@2-21-2 | Savitzky-Golay Smoothing 21 sample points, 2 <sup>nd</sup> polynomial no derivation + Savitzky-Golay Smoothing 21 sample points, 2 <sup>nd</sup> polynomial 2 <sup>nd</sup> derivative |
| sgol@2-21-0 +sgol@2-13-1 | Savitzky-Golay Smoothing 21 sample points, 2 <sup>nd</sup> polynomial no derivation + Savitzky-Golay Smoothing 13 sample points, 2 <sup>nd</sup> polynomial 1 <sup>st</sup> derivative |
| sgol@2-21-0 +sgol@2-13-2 | Savitzky-Golay Smoothing 21 sample points, 2 <sup>nd</sup> polynomial no derivation + Savitzky-Golay Smoothing 13 sample points, 2 <sup>nd</sup> polynomial 2 <sup>nd</sup> derivative |
| sgol@2-21-0 +sgol@2-17-1 | Savitzky-Golay Smoothing 21 sample points, 2 <sup>nd</sup> polynomial no derivation + Savitzky-Golay Smoothing 17 sample points, 2 <sup>nd</sup> polynomial 1 <sup>st</sup> derivative |
| sgol@2-21-0 +sgol@2-17-2 | Savitzky-Golay Smoothing 21 sample points, 2 <sup>nd</sup> polynomial no derivation + Savitzky-Golay Smoothing 17 sample points, 2 <sup>nd</sup> polynomial 2 <sup>nd</sup> derivative |

| Abbreviation             | Pretreatment (combination)                                                                                                                                                             |
|--------------------------|----------------------------------------------------------------------------------------------------------------------------------------------------------------------------------------|
| sgol@2-13-0 +sgol@2-21-1 | Savitzky-Golay Smoothing 13 sample points, 2 <sup>nd</sup> polynomial no derivation + Savitzky-Golay Smoothing 21 sample points, 2 <sup>nd</sup> polynomial 1 <sup>st</sup> derivative |
| sgol@2-13-0 +sgol@2-21-2 | Savitzky-Golay Smoothing 13 sample points, 2 <sup>nd</sup> polynomial no derivation + Savitzky-Golay Smoothing 21 sample points, 2 <sup>nd</sup> polynomial 2 <sup>nd</sup> derivative |
| sgol@2-13-0 +sgol@2-13-1 | Savitzky-Golay Smoothing 13 sample points, 2 <sup>nd</sup> polynomial no derivation + Savitzky-Golay Smoothing 13 sample points, 2 <sup>nd</sup> polynomial 1 <sup>st</sup> derivative |
| sgol@2-13-0 +sgol@2-13-2 | Savitzky-Golay Smoothing 13 sample points, 2 <sup>nd</sup> polynomial no derivation + Savitzky-Golay Smoothing 13 sample points, 2 <sup>nd</sup> polynomial 2 <sup>nd</sup> derivative |
| sgol@2-13-0 +sgol@2-17-1 | Savitzky-Golay Smoothing 13 sample points, 2 <sup>nd</sup> polynomial no derivation + Savitzky-Golay Smoothing 17 sample points, 2 <sup>nd</sup> polynomial 1 <sup>st</sup> derivative |
| sgol@2-13-0 +sgol@2-17-2 | Savitzky-Golay Smoothing 13 sample points, 2 <sup>nd</sup> polynomial no derivation + Savitzky-Golay Smoothing 17 sample points, 2 <sup>nd</sup> polynomial 2 <sup>nd</sup> derivative |
| sgol@2-17-0 +sgol@2-21-1 | Savitzky-Golay Smoothing 17 sample points, 2 <sup>nd</sup> polynomial no derivation + Savitzky-Golay Smoothing 21 sample points, 2 <sup>nd</sup> polynomial 1 <sup>st</sup> derivative |
| sgol@2-17-0 +sgol@2-21-2 | Savitzky-Golay Smoothing 17 sample points, 2 <sup>nd</sup> polynomial no derivation + Savitzky-Golay Smoothing 21 sample points, 2 <sup>nd</sup> polynomial 2 <sup>nd</sup> derivative |
| sgol@2-17-0 +sgol@2-17-1 | Savitzky-Golay Smoothing 17 sample points, 2 <sup>nd</sup> polynomial no derivation + Savitzky-Golay Smoothing 17 sample points, 2 <sup>nd</sup> polynomial 1 <sup>st</sup> derivative |
| sgol@2-17-0 +sgol@2-17-2 | Savitzky-Golay Smoothing 17 sample points, 2 <sup>nd</sup> polynomial no derivation + Savitzky-Golay Smoothing 17 sample points, 2 <sup>nd</sup> polynomial 2 <sup>nd</sup> derivative |
| sgol@2-17-0 +sgol@2-13-1 | Savitzky-Golay Smoothing 17 sample points, 2 <sup>nd</sup> polynomial no derivation + Savitzky-Golay Smoothing 13 sample points, 2 <sup>nd</sup> polynomial 1 <sup>st</sup> derivative |
| sgol@2-17-0 +sgol@2-13-2 | Savitzky-Golay Smoothing 17 sample points, 2 <sup>nd</sup> polynomial no derivation + Savitzky-Golay Smoothing 13 sample points, 2 <sup>nd</sup> polynomial 2 <sup>nd</sup> derivative |
