# Supplementary material for: Detection of Low-Level Adulteration of Hungarian Honey Using near Infrared Spectroscopy
Source: MDPI journal article supplement (doi:10.3390/chemosensors11020089), 2023-01-24
Supplement: s1 [file s1]

Archive with 1 entries (1 files):
- chemosensors-2101672-supplementary.pdf
